# Supplementary material for: The Value of Cytology in the Evaluation of Malignant Pericardial Effusions: A Systematic Review
Source: MDPI journal article supplement (doi:10.3390/diagnostics12020367), 2022-02-01
Supplement: s1 [file s1]

**Table S1.** Study Characteristics

| First Author,<br>Year                      | Country      | Study Design  | Study<br>Period      | Follow up<br>Duration | Age<br>Mean<br>(SD) | Age<br>Median<br>(IQR) | Age<br>Range<br>(years) |
|--------------------------------------------|--------------|---------------|----------------------|-----------------------|---------------------|------------------------|-------------------------|
| Lobo et al., 2020                          | Portugal     | Retrospective | 2008 -<br>2018       | NA                    | NA                  | NA                     | 9 - 79                  |
| Lopez et al.,<br>1983                      | Venezuela    | Retrospective | 1979 -<br>1982       | NA                    | 39.8<br>(12.80)     | 44                     | 18 - 55                 |
| Razek & Samir,<br>2019                     | Egypt        | Retrospective | 2006 -<br>2016       | NA                    | 39 (NA)             | NA                     | 22 - 68                 |
| Patel et al., 2013                         | USA          | Retrospective | 2000 -<br>2007       | 1 year                | 60 (14)             | NA                     | NA                      |
| Sarigul et al.,<br>1999                    | Turkey       | Retrospective | 1984 -<br>1996       | 2 - 54<br>months      | 26.98<br>(11.12)    | NA                     | 15 days -<br>75 years   |
| Wilkes et al.,<br>1995                     | USA          | Retrospective | 1968 -<br>1994       | 57 days -<br>15 years | NA                  | 50                     | 17 - 77                 |
| Edoute et al.,<br>1992                     | Israel       | Retrospective | 1977 -<br>1989       | NA                    | NA                  | 56                     | 13 - 79                 |
| Campbell et al.,<br>1992                   | USA          | Prospective   | 1987 -<br>1988       | >12<br>months         | 52.64<br>(10.88)    | 53                     | 26 - 70                 |
| Krikorian &<br>Hancock, 1978               | USA          | Retrospective | 1970 -<br>1976       | NA                    | NA                  | 46                     | 6 - 80                  |
| Hou et al., 2020                           | USA          | Retrospective | Jan -<br>Dec<br>2014 | NA                    | NA                  | NA                     | NA                      |
| Rodriguez et al.,<br>2020                  | Brazil & USA | Retrospective | 2014 -<br>2019       | 8 months              | 51.25<br>(NA)       | NA                     | <1 - 89                 |
| Dermawan &<br>Policarpio-<br>Nicolas, 2020 | USA          | Retrospective | 2000 -<br>2016       | NA                    | NA                  | 65                     | 3 - 97                  |
| Volk et al., 2019                          | USA          | Retrospective | 2011 -<br>2018       | NA                    | 59.7<br>(15.1)      | NA                     | NA                      |
| Lekhukul et al.,<br>2018                   | USA          | Prospective   | 2007 -<br>2016       | <5 years              | NA                  | 60 (15)                | NA                      |
| Strobbe et al.,<br>2017                    | Belgium      | Retrospective | 2006 -<br>2016       | 10 years              | 62<br>(15.9)        | NA                     | 0 - 94                  |
| Gecmen et al.,<br>2017                     | Turkey       | Retrospective | 2007 -<br>2016       | NA                    | 60<br>(16.6)        | NA                     | NA                      |
| Saab et al., 2016                          | USA          | Retrospective | 2008 -               | <190 days             | 63 (NA)             | NA                     | 2 - 95                  |

|                              |                                     |               |             |                     |             |      |                   |
|------------------------------|-------------------------------------|---------------|-------------|---------------------|-------------|------|-------------------|
|                              |                                     |               | 2014        |                     |             |      |                   |
| He et al., 2017              | China                               | Retrospective | 2012 - 2016 | 1 month - 43 months | 56.4 (NA)   | NA   | 13 - 83           |
| Rossi et al., 2015           | Brazil, Italy, Luxembourg, Portugal | Prospective   | 2000 - 2013 | NA                  | NA          | 48   | 23 - 92           |
| Zhu et al., 2015             | USA                                 | Retrospective | 1983 - 2013 | NA                  | 56 (NA)     | NA   | 8 days - 85 years |
| Jeon et al., 2014            | Republic of Korea                   | Retrospective | 2003 - 2012 | NA                  | 57 (NA)     | 57   | 29 - 82           |
| Dragoescu & Liu, 2013        | USA                                 | Retrospective | 2005 - 2010 | NA                  | 52.6 (NA)   | NA   | 6 - 85            |
| Gupta et al., 2012           | India                               | Retrospective | 1998 - 2007 | NA                  | 51.5 (NA)   | NA   | 6 - 85            |
| Mirhosseini et al., 2012     | Iran                                | Retrospective | 2004 - 2011 | Median: 15 months   | 50.3 (15.5) | NA   | 14 - 84           |
| Wagner et al., 2010          | USA                                 | Retrospective | 2004 - 2009 | NA                  | NA          | 57.4 | 1 - 86            |
| Maisch et al., 2010          | Germany & Serbia                    | Observational | 1988 - 2008 | <1 year             | 58.8 (13.2) | NA   | NA                |
| Hyun Kil et al., 2007        | Republic of Korea                   | Retrospective | 1995 - 2007 | Mean: 28 months     | 56 (39)     | NA   | NA                |
| Neragi-Miandoab et al., 2008 | USA                                 | Retrospective | 1999 - 2004 | NA                  | 58.4 (14.3) | NA   | 19 - 79           |
| Yonemori et al., 2007        | Japan                               | Retrospective | 1998 - 2005 | NA                  | NA          | 58   | 32 - 72           |
| Gornik et al., 2005          | USA                                 | Retrospective | 1999 - 2003 | 1 year              | 57.5 (1)    | NA   | 20.8 - 93.5       |
| Cullinane et al., 2004       | USA                                 | Retrospective | 1990 - 2001 | <8.3 months         | 50          | NA   | 20 - 82           |
| García-Riego et al., 2001    | Spain                               | Retrospective | 1976 - 1999 | NA                  | 53.6 (NA)   | NA   | 4 - 77            |
| Gupta et al., 2000           | New Zealand                         | Retrospective | 1991 - 1998 | NA                  | 52/F - 59/M | NA   | NA                |
| Robles et al., 1997          | Spain                               | Retrospective | 1992 - 1995 | Mean: 20.5 months   | 52.4 (NA)   | 54   | 18 - 81           |

|                              |        |               |             |                    |           |          |                  |
|------------------------------|--------|---------------|-------------|--------------------|-----------|----------|------------------|
| Malamou-Mitsi et al., 1995   | Greece | Retrospective | >7 years    | NA                 | 56.9 (NA) | NA       | 16 - 91          |
| Bardales et al., 1996        | USA    | Retrospective | 1984 - 1993 | NA                 | NA        | 57       | 14 - 82          |
| Haskell & French, 1985       | USA    | Retrospective | 1977 - 1984 | NA                 | NA        | NA       | NA               |
| Zipf & Johnston, 1972        | USA    | Retrospective | NA          | NA                 | NA        | NA       | NA               |
| Kabukcu et al., 2004         | Turkey | Retrospective | 1998 - 2002 | Median: 18 months  | 51 (17)   | NA       | 12 - 80          |
| Liso et al., 2019            | Italy  | Retrospective | 2011 - 2017 | NA                 | NA        | 62       | 39 - 81          |
| Parsons & Jarzembowski, 2016 | USA    | Retrospective | 2000 - 2015 | Mean: 4.7 years    | NA        | NA       | NA               |
| Medary et al., 1996          | USA    | Retrospective | 1984-1995   | 4 months - 7 years | NA        | 14 years | 4 months-7 years |

Abbreviations: NA, information not available

**Table S2.** Gross findings of pericardial effusions and their association with malignancy.

| First Author, Year    | No of Serous Effusions (Malignant) | No of Hemorrhagic Effusions (Malignant) | No of Purulent Effusions (Malignant) | No of Serosanguinous Effusions (Malignant) | Benign/Total Effusion Volume               | Malignant Effusion Volume        |
|-----------------------|------------------------------------|-----------------------------------------|--------------------------------------|--------------------------------------------|--------------------------------------------|----------------------------------|
| Lopez et al., 1983    | 0                                  | 12 (12)                                 | 0                                    | 0                                          | NA / 400 - 1000 mL                         | 400 - 1000 mL                    |
| Patel et al., 2013    | NA                                 | NA                                      | NA                                   | NA                                         | NA                                         | mean: 814 mL                     |
| Sarigul et al., 1999  | NA                                 | NA                                      | NA                                   | NA                                         | median: 975.25 ± 48.46 mL / NA             | median: 1131.25 ± 97.48 mL       |
| Wilkes et al., 1995   | 0                                  | 0                                       | 0                                    | 0                                          | mean: NA / 509 mL (range 5 - 2300 mL)      | NA                               |
| Edoute et al., 1992   | 7 (3)                              | 48 (38)                                 | 2 (0)                                | 0                                          | median: 470 mL (range 70 - 1750) / NA      | median: 630 mL (range 80 - 2250) |
| Campbell et al., 1992 | 0                                  | 0                                       | 0                                    | 0                                          | mean: 434 mL ± 357 mL / (range 100 - 1250) | mean: 554 mL ± 332               |

|                          |         |          |        |         |                                                                   |                                   |
|--------------------------|---------|----------|--------|---------|-------------------------------------------------------------------|-----------------------------------|
| Rodriguez et al., 2020   | 0       | 0        | 0      | 0       | mean: 300.3 mL (range 3 - 1700) / mean: 299 mL (range 3 - 1700)   | mean: 307 mL (range 8 - 800)      |
| Lekhukul et al., 2018    | 53 (NA) | 35 (NA)  | 0      | 83 (NA) | NA / median: 485 mL (IQR 350-719)                                 | NA                                |
| Strobbe et al., 2017     | 62 (14) | 149 (38) | 0      | 53 (16) | NA                                                                | NA                                |
| Gecmen et al., 2017      | 108 (2) | 175 (42) | 0      | 0       | NA                                                                | NA                                |
| Saab et al., 2016        | 0       | 0        | 0      | 0       | mean: 75 mL (range, 10-900 mL) / NA                               | mean: 49 mL (range, 25-900 mL)    |
| He et al., 2017          | 0       | NA (43)  | 0      | 0       | NA                                                                | NA                                |
| Jeon et al., 2014        | 18 (NA) | 0        | 0      | 37 (NA) | NA / median: 500 mL (range 100 to 1500 mL)                        | NA                                |
| Dragoescu & Liu, 2013    | 0       | 0        | 0      | 0       | NA / mean: 61 mL (range < 1 mL to 1150 mL)                        | NA                                |
| Mirhosseini et al., 2012 | 53 (NA) | 69 (NA)  | 0      | 0       | NA / mean: 752 ± 429 mL                                           | NA                                |
| Maisch et al., 2010      | 0       | 25 (23)  | 0      | 0       | NA                                                                | NA                                |
| Hyun Kil et al., 2007    | 0       | 8        | 0      | 0       | NA                                                                | NA                                |
| Yonemori et al., 2007    | 0       | 0        | 0      | 0       | NA / median: 953 mL (range 200–3970 mL)                           | NA                                |
| Cullinane et al., 2004   | 15 (NA) | 32 (NA)  | 2 (NA) | 14 (NA) | NA/ mean: 565 mL (range <300 - 1,200 mL)                          | NA                                |
| Robles et al., 1997      | 11 (NA) | 6 (NA)   | 1 (NA) | 4 (NA)  | mean: 696 mL (range 250 - 1500) / mean: 817 mL (range: 250–1,700) | mean: 1041 mL (range 400 - 1,700) |
| Kabukcu et al., 2004     | 12 (NA) | 37 (NA)  | 1 (NA) | 0       | NA / mean: 1450 ± 280 mL                                          | NA                                |

Abbreviations: NA, information not available

**Table S3.** Most prevalent primary cancer sites/neoplasms in patients presenting with cancer-associated pericardial effusions.

| First Author, Year                  | Most common primary cancer sites/neoplasms (No of patients)                                                                                                                                                     |
|-------------------------------------|-----------------------------------------------------------------------------------------------------------------------------------------------------------------------------------------------------------------|
| Lobo et al., 2020                   | Breast (16), Lung (13), Gastrointestinal (3)                                                                                                                                                                    |
| Lopez et al., 1983                  | Lung (8), Hematolymphoid (2)                                                                                                                                                                                    |
| Razek & Samir, 2019                 | Lung (5), Hematolymphoid (4), Breast (4), Thymoma (2), Pleural Mesothelioma (2)                                                                                                                                 |
| Patel et al., 2013                  | Lung (33), Breast (17), Hematolymphoid (17), Gastrointestinal (9; 3 gastric, 2 colon, 2 pancreatic, 1 anal, 1 esophageal), Gynecological (6; 4 ovarian, 1 cervical, 1 uterine)                                  |
| Sarigul et al., 1999                | Breast (16), Lung (14), Hematolymphoid (6), Seminoma (2)                                                                                                                                                        |
| Wilkes et al., 1995                 | Lung (38), Breast (29), Hematolymphoid (33), Sarcoma (5), Gastrointestinal (7; 3 esophageal, 3 gastric, 1 colon), Gynecological (2; 1 ovarian, 1 cervical), Renal (2), Bladder (2), Melanoma (3), Germ cell (2) |
| Edoute et al., 1992                 | Lung (22), Breast (19)                                                                                                                                                                                          |
| Campbell et al., 1992               | Breast (8), Lung (7), Gastrointestinal (3; esophageal), Head & Neck (2), Hematolymphoid (2), Gynecological (2; 1 endometrial, 1 ovarian)                                                                        |
| Rodriguez et al., 2020              | Lung (11), Breast (7), Gastrointestinal (4; 2 colon, 2 stomach), Hematolymphoid (4)                                                                                                                             |
| Dermawan & Policarpio-Nicolas, 2020 | Lung (55), Breast (17), Gynecological (9; 8 tubo-ovarian, 1 endometrial), Hematolymphoid (12), GI (8; 6 stomach, 1 esophagus, 1 colorectal), Head & Neck (2), Mesothelium (2)                                   |
| Volk et al., 2019                   | Adenocarcinoma (11), Small Cell Carcinoma (3)                                                                                                                                                                   |
| Lekhukul et al., 2018               | Carcinoma and Sarcoma (141), Hematolymphoid (30)                                                                                                                                                                |
| Strobbe et al., 2017                | Lung (36), Breast (12), Pleural Mesothelioma (4), Gynecological (5; 4 ovary, 1 cervical), Gastrointestinal (4; 2 esophageal, 1 gastric, 1 rectal); Hematolymphoid (2)                                           |
| Gecmen et al., 2017                 | Lung (24), Mesothelioma (4), Gastrointestinal (3; 1 gastric, 2 esophageal), Hematopoietic (2)                                                                                                                   |
| Saab et al., 2016                   | Lung (20), Breast (12), Gastrointestinal (7), Gynecological (2), Hematolymphoid (3)                                                                                                                             |
| He et al., 2017                     | Lung (58), Breast (4), Hematologic (4), Thymoma (2), Gastrointestinal (2; esophagus), Gynecological (2; 1 ovarian, 1 cervical)                                                                                  |
| Rossi et al., 2015                  | Lung (9), Gynecological (4; ovarian)                                                                                                                                                                            |
| Zhu et al., 2015                    | Lung (45), Breast (18), GI (9; 7 esophageal, 2 rectal), Gynecological (5; ovarian), Hematolymphoid (12), Mesothelioma (4)                                                                                       |
| Jeon et al., 2014                   | Lung (36), Breast (6), Gastrointestinal (5), Hematolymphoid (4)                                                                                                                                                 |
| Dragoescu & Liu, 2013               | Lung (18), Breast (9)                                                                                                                                                                                           |
| Gupta et al., 2012                  | Breast (2), Hematolymphoid (4), Mesothelioma (2)                                                                                                                                                                |
| Mirhosseini et al.,                 | Lung (36), Hematolymphoid (9), Breast (7), Gynecological (4; ovarian), Bladder (3),                                                                                                                             |

|                              |                                                                                                                    |
|------------------------------|--------------------------------------------------------------------------------------------------------------------|
| 2012                         | Gastrointestinal (5; 3 colorectal, 2 stomach)                                                                      |
| Wagner et al., 2010          | Lung (78), Breast (35), Hematolymphoid (17), Gastrointestinal (13)                                                 |
| Maisch et al., 2010          | Lung (22), Breast (8), Gastrointestinal (3; 1 esophageal, 1 colon), Hematolymphoid (2)                             |
| Hyun Kil et al., 2007        | Lung (32), Breast (8), Hematolymphoid (6), Gastrointestinal (5; stomach), Gynecological (3; cervical)              |
| Neragi-Miandoab et al., 2008 | Lung (32), Breast (8), Gastrointestinal (7; 5 esophageal, 2 colon), Hematolymphoid (8)                             |
| Yonemori et al., 2007        | Lung (34), Breast (13), GI (8; 6 esophageal, 1 gastric, 1 colorectal), Gynecological (2)                           |
| Gornik et al., 2005          | Lung (33), Breast (16), Hematolymphoid (13), GI (9; 5 esophagus, 4 colorectal), Sarcoma (5)                        |
| Cullinane et al., 2004       | Lung (15), Breast (22), Hematolymphoid (17)                                                                        |
| García-Riego et al., 2001    | Lung (39), Breast (10), Gastrointestinal (3; 2 esophageal, 1 gastric), Hematolymphoid (7)                          |
| Gupta et al., 2000           | Lung (12), Breast (4), Hematolymphoid (2)                                                                          |
| Robles et al., 1997          | Breast (4), Lung (2)                                                                                               |
| Malamou-Mitsi et al., 1995   | Lung (6), Epidermoid carcinoma (2), Undifferentiated (2)                                                           |
| Bardales et al., 1996        | Lung (22), Breast (10), Hematopoietic (2)                                                                          |
| Zipf & Johnston, 1972        | Lung (3), Breast (5), Gastrointestinal (3; 2 colon; 1 gastric)                                                     |
| Liso et al., 2019            | Lung (21), Breast (5)                                                                                              |
| Parsons & Jarzembowski, 2016 | Hematolymphoid (1), Rhabdomyosarcoma (2)                                                                           |
| Medary et al., 1996          | ALL (3), AML (1), HL (1), B-cell Lymphoma (1), Medulloblastoma (1), Rhabdomyosarcoma (1), Desmoplastic sarcoma (1) |

**Table S4.** Most prevalent primary cancer sites/neoplasms in patients presenting with malignant pericardial effusions diagnosed with cytology and/or biopsy.

| Study        | Lung (total, includes small cell carcinoma) | Small cell lung carcinoma | Breast | Gastrointestinal tract | Gynecological | Hematolymphoid | Others/Unknown |
|--------------|---------------------------------------------|---------------------------|--------|------------------------|---------------|----------------|----------------|
| Lobo         | 13                                          |                           | 16     | 3                      | 1             |                | 3              |
| Lopez        | 8                                           | 0                         |        |                        |               | 2              | 2              |
| Razek        | 5                                           | 0                         | 4      |                        |               | 4              | 4              |
| Wilkes       | 24                                          | 0                         | 24     |                        |               | 9              | 13*            |
| Campbell     | 3                                           |                           | 4      | 2                      | 1             |                | 1              |
| Rodriguez    | 11                                          | 2                         | 7      | 4                      | 1             | 4              | 2              |
| Dermawan     | 55                                          | 0                         | 17     | 8                      | 9             | 12             | 7              |
| Strobbe      | 36                                          | 3                         | 12     | 4                      | 5             | 2              | 9              |
| Gecmen       | 24                                          | 0                         | 1      | 3                      | 1             | 2              | 13             |
| Saab         | 20                                          | 1                         | 12     | 7                      | 2             | 3              | 3              |
| Rossi        | 9                                           |                           | 1      |                        | 4             | 1              | 21             |
| Zhu          | 45                                          | 1                         | 18     | 9                      | 5             | 12             | 56             |
| Dragoescu    | 18                                          | 1                         | 9      |                        | 1             | 1              | 2              |
| Gupta, 2012  |                                             |                           | 2      |                        |               | 4              | 4              |
| Maisch       | 22                                          |                           | 8      | 3                      |               | 2              | 7              |
| Miandoab     | 32                                          |                           | 8      | 7                      | 1             | 8              | 7              |
| Yonemori     | 34                                          | 2                         | 13     | 8                      | 2             |                | 3              |
| Garcia-Riego | 39                                          | 0                         | 10     | 3                      |               | 7              | 9              |
| Gupta, 2000  | 12                                          | 3                         | 4      | 1                      |               | 2              | 3              |
| Robles       | 1                                           |                           | 2      |                        |               | 1              |                |
| Bardales     | 22                                          |                           | 10     | 1                      | 1             | 2              | 5              |
| Zipf         | 3                                           |                           | 5      | 3                      |               | 1              | 3              |

\*in this study, gastrointestinal and gynecological cancer cases are included in the others/unknown category

**Table S5.** Most prevalent primary cancer sites/neoplasms in patients presenting with malignant pericardial effusions diagnosed exclusively with cytology.

| Study        | Lung (total) | Small cell lung carcinoma | Breast | Gastrointestinal tract | Gynecological | Hematolymphoid | Others/Unknown |
|--------------|--------------|---------------------------|--------|------------------------|---------------|----------------|----------------|
| Lobo         | 13           |                           | 16     | 3                      | 1             |                | 3              |
| Lopez        | 7            | 0                         |        |                        |               | 2              | 2              |
| Campbell     | 3            |                           | 4      | 2                      | 1             |                | 1              |
| Rodriguez    | 11           | 2                         | 7      | 4                      | 1             | 4              | 2              |
| Dermawan     | 55           | 0                         | 17     | 8                      | 9             | 12             | 7              |
| Strobbe      | 36           | 3                         | 12     | 4                      | 5             | 2              | 9              |
| Gecmen       | 24           | 0                         | 1      | 3                      | 1             | 2              | 13             |
| Saab         | 20           | 1                         | 12     | 7                      | 2             | 3              | 3              |
| Rossi        | 9            |                           | 1      |                        | 4             | 1              | 21             |
| Zhu          | 45           | 1                         | 18     | 9                      | 5             | 12             | 56             |
| Dragoescu    | 18           | 1                         | 9      |                        | 1             | 1              | 2              |
| Gupta, 2012  |              |                           | 2      |                        |               | 4              | 4              |
| Yonemori     | 34           | 2                         | 13     | 8                      | 2             |                | 3              |
| Garcia-Riego | 39           | 0                         | 10     | 3                      |               | 7              | 9              |
| Gupta, 2000  | 12           | 3                         | 4      | 1                      |               | 2              | 3              |
| Robles       | 1            |                           | 2      |                        |               | 1              |                |
| Zipf         | 3            |                           | 5      | 3                      |               | 1              | 3              |
